# Supplementary material for: Using waste to treat waste: facile synthesis of hollow carbon nanospheres from lignin for water decontamination
Source: Royal Society of Chemistry journal article supplement (doi:10.1039/d3sc05275c), 2023-11-27
Supplement: d3sc05275c1.pdf [file d3sc05275c1.pdf]

# Using waste to treat waste: facile synthesis of hollow carbon nanospheres from lignin for water decontamination

*Xiang Liu,<sup>a\*</sup> Zixuan Hao,<sup>a</sup> Chen Fang,<sup>a</sup> Kun Pang,<sup>a</sup> Jiaying Yan,<sup>a</sup> Yingping Huang,<sup>a</sup>*

*Di Huang<sup>a\*</sup> and Didier Astruc<sup>a,b\*</sup>*

<sup>a</sup>Engineering Research Center of Eco-Environment in Three Gorges Reservoir Region of Ministry of Education, College of Materials and

Chemical Engineering, China Three Gorges University, Yichang, Hubei 443002, China. Email: [xiang.liu@ctgu.edu.cn](mailto:xiang.liu@ctgu.edu.cn) (X. Liu) and

[huangd94@iccas.ac.cn](mailto:huangd94@iccas.ac.cn) (D. Huang)

<sup>b</sup>ISM, UMR CNRS N°5255, Université de Bordeaux, 351 Cours de la Libération, 33405 Talence Cedex, France. E-mail: [didier.astruc@u-](mailto:didier.astruc@u-bordeaux.fr)

[bordeaux.fr](mailto:didier.astruc@u-bordeaux.fr)

## Table of Content

|                                                                                       |    |
|---------------------------------------------------------------------------------------|----|
| 1. Materials.....                                                                     | S2 |
| 2. Characterization.....                                                              | S2 |
| 3. Synthesis of HCNs.....                                                             | S2 |
| 4. Experimental Procedures.....                                                       | S2 |
| 5. Physical characterization of nanocatalysts ( <b>Fig S1-S10 and Table S1</b> )..... | S3 |

## 1. Materials.

The chemicals are used without further purification. Peroxydisulfate ( $K_2S_2O_8$ , PDS) was bought from Rhawn Co., Ltd. oxytetracycline (OTC) from Tianjin Heowns Biochemical Co., Ltd., phenol, tetracyclines (TC) and chlortetracycline (CTC) from Shanghai Macklin Biochemical Co., 3-aminophenol and sulfamethoxazole (SMX) from Aladdin chemical reagent Co., Ltd. sodium hydroxide (NaOH, AR, 96%, Tianjin Kemiou Chemical Reagent Co., Ltd., ethyl alcohol from Tianli Chemical Reagent Co., Ltd., Tert- butylalcohol was purchased from Aladdin Reagent Co., Ltd. Sodium azide ( $NaN_3$ ) from Wuhan geao Chemical Technology Co., Ltd. deionized water was utilized in all the experiments.

## 2. Characterization

Transmission electron microscopy (TEM) were performed by a JEOL-JEM 2100F microscope operated at 200 kV. Energy Dispersive Spectrometer (EDS) Mapping were performed with a TECNAI G2 F20 microscope operated at 200 kV. The morphologies of the catalysts were observed by scanning electron microscopy (SEM, FEI- Quanta 250 FEG). X-ray diffraction (XRD) analyses were measured on a Bruker AXS-D8 Advanced. X-ray photoelectron spectrometry (XPS) was performed on a ThermoFisher Nexsa. Electron paramagnetic resonance (EPR) spectroscopy was conducted on a Bruker A300. Fourier transform infrared spectrometer (FT-IR) were measured on ThermoFisher-IS50. Raman was performed on Horiba scientific-LabRAM HR evolution.

## 3. Synthesis of HCNs

First, 0.5 g of dealkali lignin was pyrolyzed at 400 °C, 500 °C resp. 600 °C for 4 h in a tubular furnace, with a ramp rate of 2.5 °C·min<sup>-1</sup>. Then, the reaction system was cooled to 30 °C using a cooling rate of 2.5 °C/min. Next, the residue was obtained and washed with deionized H<sub>2</sub>O resp. EtOH, and it was dried overnight at 60 °C. The final products are labeled HCN-400, HCN-500 and HCN-600, respectively.

## 4. Experimental Procedures.

In a typical procedure, 5 mg of PDS was added into OTC solution (20 mg/L, 50 mL) in a round-

bottom flask at 30 °C. Then, OTC degradation was activated by adding HCN-500 (12.5 mg). During the reaction, a 2 mL of reaction solution was extracted out at determined intervals. It was filtered by 0.22 μm film, and immediately tested by UV-Vis. In the quenching experiments, TBA, EtOH, NaN<sub>3</sub> and BQ, respectively, was injected into the reaction medium, and the OTC degradation was carried out at the same condition. Cycle experiment: The HCN-500 was collected by the simple filtration, washed for use in the next cycle.

The degradation rate was calculated as:

$$\text{Degradation rate (\%)} = \frac{C_0 - C_t}{C_0} \times 100\%$$

where C<sub>0</sub> and C<sub>t</sub> are the initial and final pollutant concentration determined on UV absorbance value .

### 5. Physical characterization of the nanocatalysts (Fig. S1-S10 and Table S1)

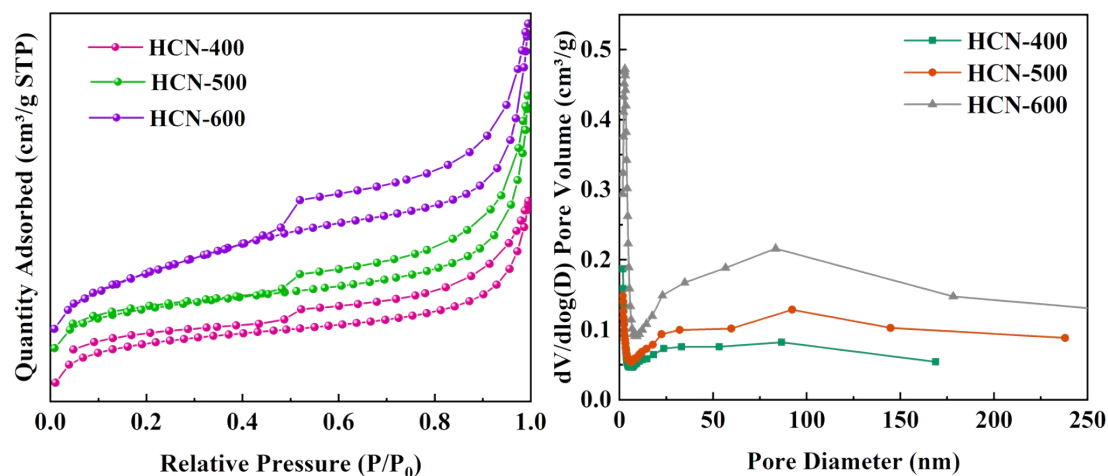

Figure S1. BET of HCNs.

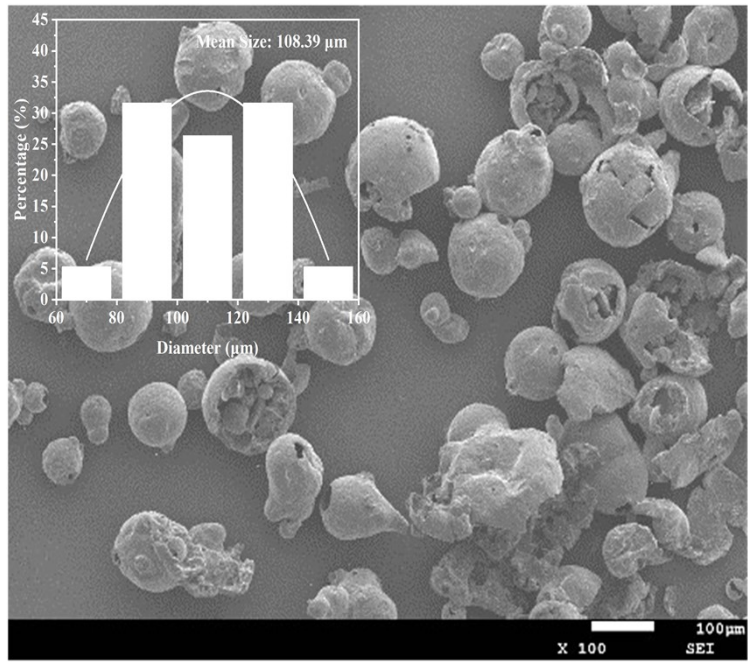

**Figure S2.** SEM of dealkali lignin

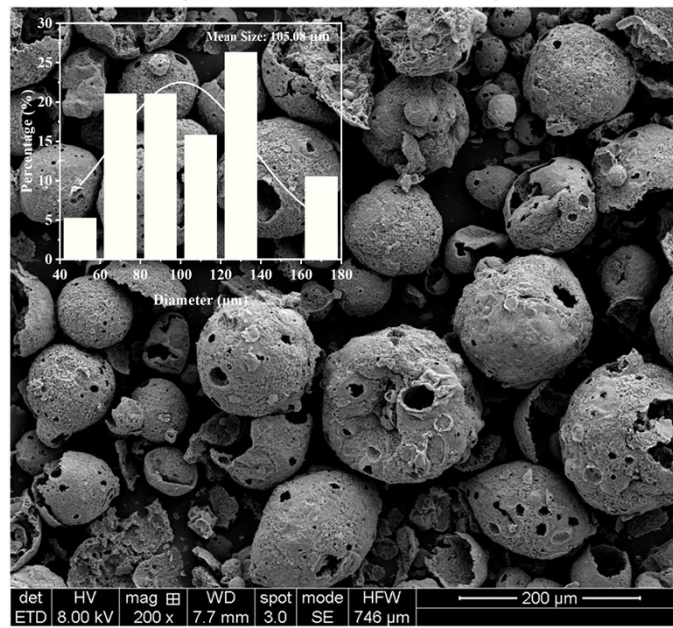

**Figure S3.** SEM of HCN-400

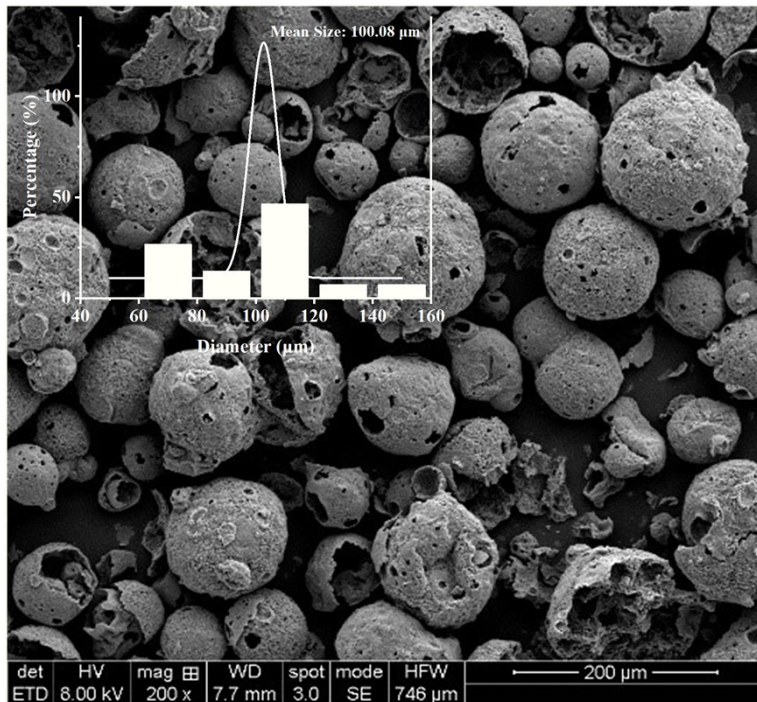

Figure S4. SEM of HCN-500

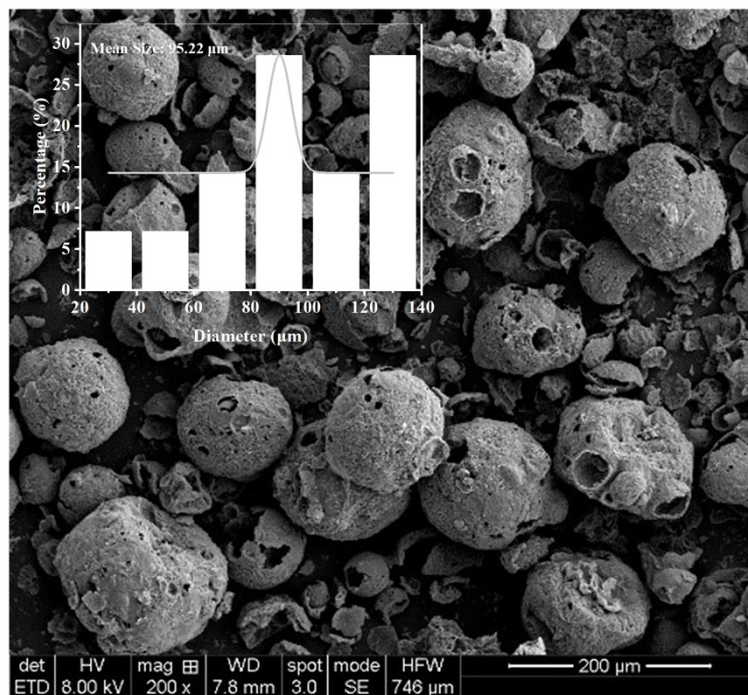

Figure S5. SEM of HCN-600

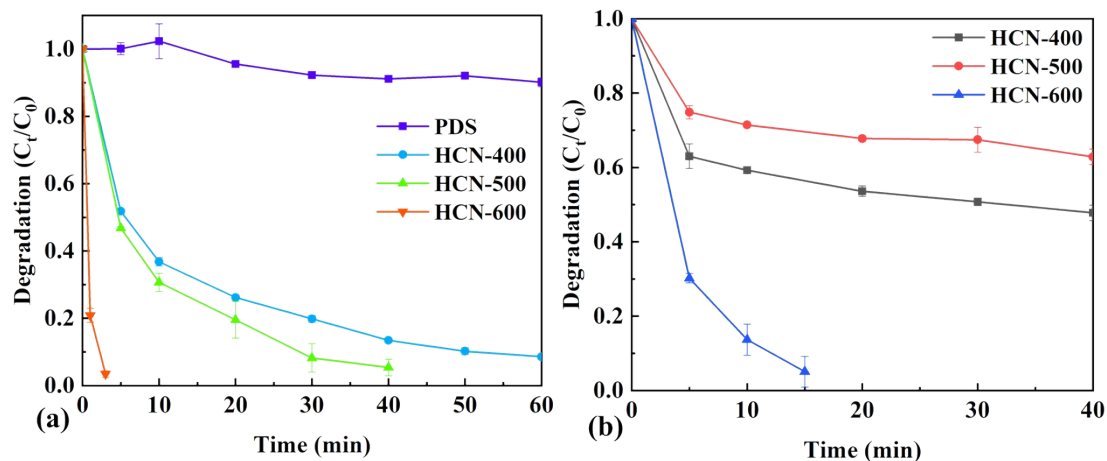

**Figure S6.** (a) Comparison of OTC degradation catalyzed by HCN-400, HCN-500 and HCN-600. Conditions: 20 mg/L of OTC, 0.1 g/L of PDS and 0.5 g/L of catalyst at 30 °C; (b) Comparison of OTC adsorption by HCN-400, HCN-500 and HCN-600. Conditions: 20 mg/L of OTC and 0.5 g/L of catalyst at 30 °C;

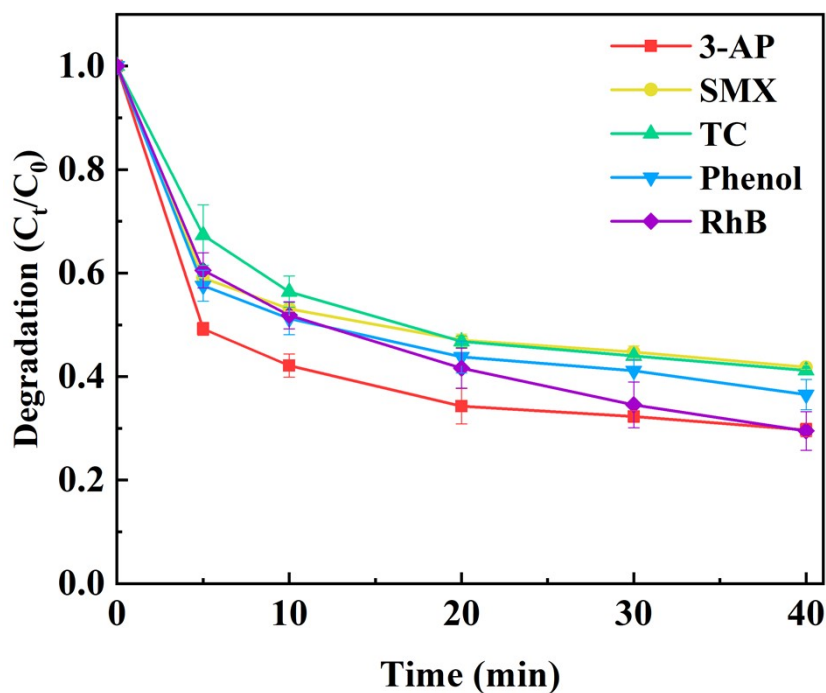

**Figure S7.** The removal of 3-aminophenol (3-AP), sulfamethoxazole (SMX), tetracycline (TC), phenol and Rhodamine B (RhB) over HCN-500/PDS system.

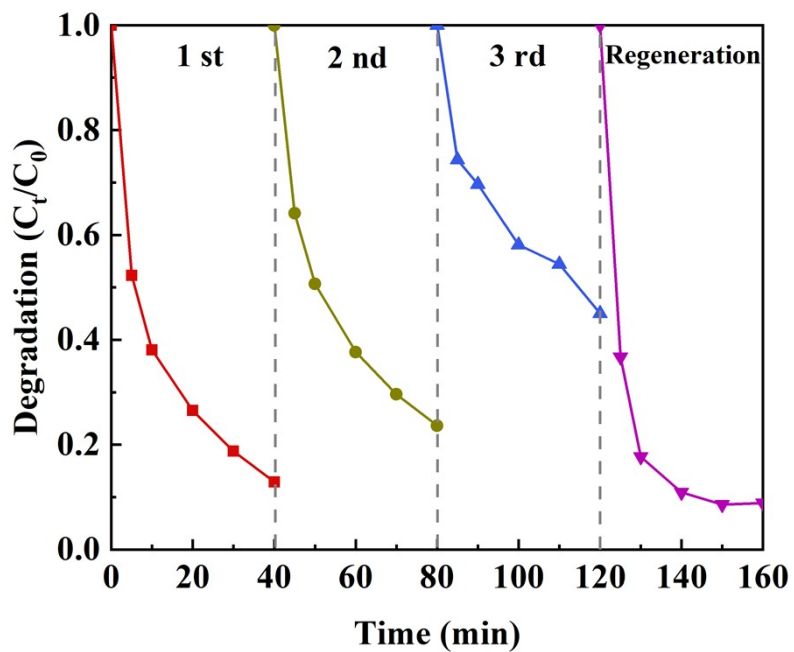

Figure S8. Stability of HCN-500 in OTC degradation.

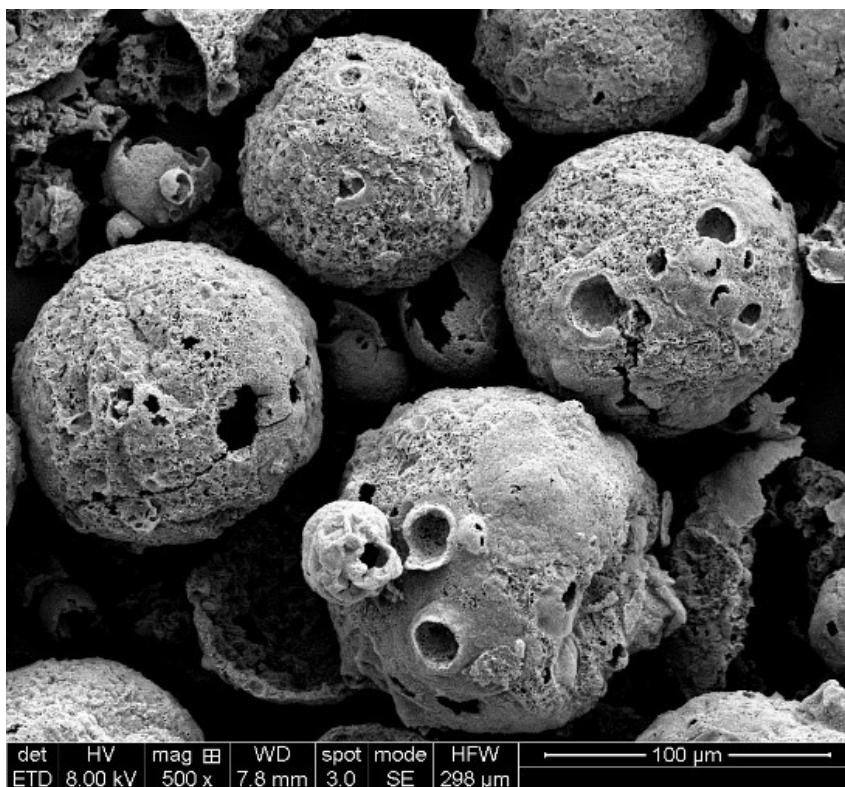

Figure S9. SEM of reactivated HCN-500

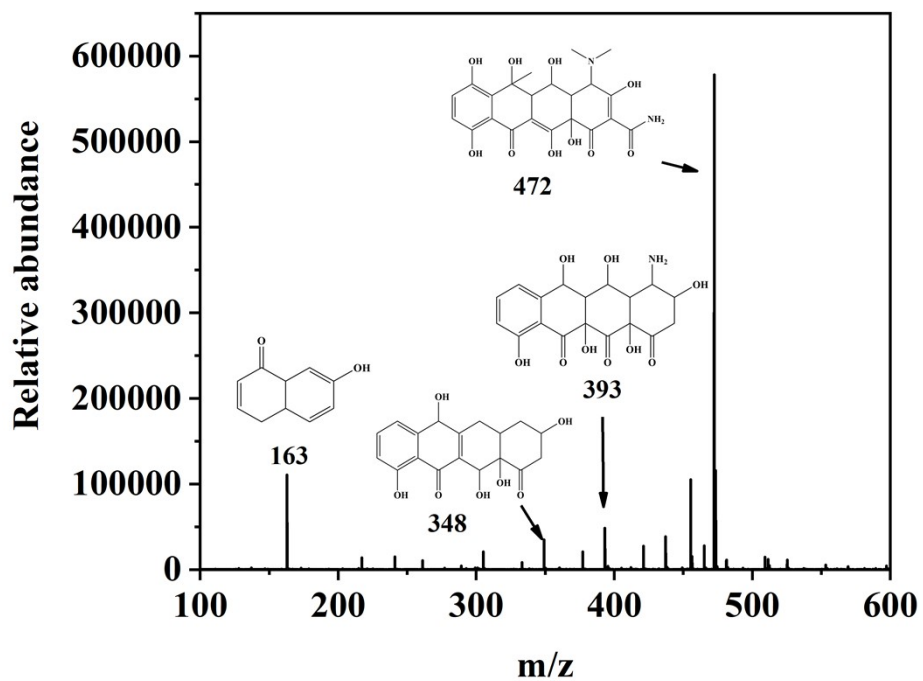

Figure S10. HR-MS of the totally degraded OTC solution



**Table S1** Comparison of HCN-500/PDS with other reported catalytic systems for OTC degradation.

| Entry | OTC      | Catalyst                                          | Oxidant                                    | Other additive                    | Degradation efficiency | Time          | Ref              |
|-------|----------|---------------------------------------------------|--------------------------------------------|-----------------------------------|------------------------|---------------|------------------|
| 1     | 20 mg/L  | <b>HCN-500</b><br>(0.5 g/L)                       | <b>PDS (0.1 g/L)</b>                       | -                                 | <b>95%</b>             | <b>40 min</b> | <b>This work</b> |
| 2     | 20 mg/L  | BBC <sub>3</sub><br>(0.3 g/L)                     | PDS (2 mM)                                 | -                                 | 94%                    | 120 min       | [31a]            |
| 3     | 5 mg/L   | O-Gcn<br>(0.1 g/L)                                | PMS (1 mM)                                 | -                                 | 63.7%                  | 60 min        | [31b]            |
| 4     | 20 mg/L  | ACN-10<br>(0.3 g/L)                               | -                                          | 300 W XL<br>( $\lambda > 420$ nm) | 79.3%                  | 60 min        | [31c]            |
| 5     | 15 mg/L  | N,S-CSs900-10%-OH<br>(0.5 g/L)                    | PMS (3 mM)                                 | PH=4                              | 95.9%                  | 60 min        | [31d]            |
| 6     | 20 mg/L  | TCN-5<br>(0.5 g/L)                                | -                                          | 300 W XL<br>( $\lambda > 420$ nm) | 93%                    | 60 min        | [31e]            |
| 7     | 50 mg/L  | CB (0.05 g/L)                                     | PDS (1 g/L)                                | PH=5                              | 60%                    | 40 min        | [31f]            |
| 8     | 30 mg/L  | g-C <sub>3</sub> N <sub>4</sub> (0.5 g/L)         | -                                          | 300 W XL<br>( $\lambda > 420$ nm) | 64.8%                  | 120 min       | [31g]            |
| 9     | 50 mg/L  | 14Fe <sub>3</sub> O <sub>4</sub> -Cs<br>(0.5 g/L) | H <sub>2</sub> O <sub>2</sub> (10 Mm)      | -                                 | 90%                    | 120 min       | [31h]            |
| 10    | 600 mg/L | nZVI-BC <sub>1000</sub><br>(0.1 g/L)              | PDS (0.5 mM)                               | -                                 | 98.3%                  | 300 min       | [31i]            |
| 11    | 20 mg/L  | 1-B@TBC-600<br>(0.1 g/L)                          | PMS (0.5 mM)                               | -                                 | 90%                    | 20 min        | [31j]            |
| 12    | 30 mg/L  | Co@NC-800<br>(0.2 g/L)                            | PMS (0.2 g/L)                              | -                                 | 91.3%                  | 30 min        | [31k]            |
| 13    | 30 mg/L  | CN (300 mg/L)                                     | PMS<br>(0.1 g/L)                           | PH=4.34                           | 69.1%                  | 45 min        | [31l]            |
| 14    | 20 mg/L  | 2-EC (0.5 g/L)                                    | H <sub>2</sub> O <sub>2</sub><br>(10.0 mM) | PH=5                              | 97.1%                  | 120 min       | [31m]            |
